# Supplementary material for: Predisposition of HLA-DRB1*04:01/*15 heterozygous genotypes to Japanese mixed connective tissue disease
Source: PubMed Central journal article supplement (PMC9200795; doi:10.1038/s41598-022-14116-x), 2022-06-15
Supplement: 41598_2022_14116_MOESM2_ESM.pdf [file 41598_2022_14116_MOESM2_ESM.pdf]

Supplementary Table S2. *DQB1* allele carrier frequency in MCTD patients and controls.

|                   | MCTD<br>(n=116) | Control<br>(n=413) | <i>P</i> | OR   | <i>P<sub>c</sub></i> | 95%CI        |
|-------------------|-----------------|--------------------|----------|------|----------------------|--------------|
| <i>DQB1*02:01</i> | 0 (0.0)         | 2 (0.5)            | 1.0000   | 0.71 | >1                   | (0.03–14.82) |
| <i>DQB1*03:01</i> | 23 (19.8)       | 96 (23.2)          | 0.5292   | 0.82 | >1                   | (0.49–1.36)  |
| <i>DQB1*03:02</i> | 20 (17.2)       | 83 (20.1)          | 0.5956   | 0.83 | >1                   | (0.48–1.42)  |
| <i>DQB1*03:03</i> | 44 (37.9)       | 111 (26.9)         | 0.0279   | 1.66 | 0.3903               | (1.08–2.57)  |
| <i>DQB1*04:01</i> | 25 (21.6)       | 86 (20.8)          | 0.8975   | 1.04 | >1                   | (0.63–1.73)  |
| <i>DQB1*04:02</i> | 8 (6.9)         | 29 (7.0)           | 1.0000   | 0.98 | >1                   | (0.44–2.21)  |
| <i>DQB1*05:01</i> | 10 (8.6)        | 44 (10.7)          | 0.6052   | 0.79 | >1                   | (0.39–1.63)  |
| <i>DQB1*05:02</i> | 3 (2.6)         | 16 (3.9)           | 0.7774   | 0.66 | >1                   | (0.19–2.30)  |
| <i>DQB1*05:03</i> | 6 (5.2)         | 34 (8.2)           | 0.3247   | 0.61 | >1                   | (0.25–1.49)  |
| <i>DQB1*06:01</i> | 37 (31.9)       | 144 (34.9)         | 0.5813   | 0.87 | >1                   | (0.56–1.36)  |
| <i>DQB1*06:02</i> | 25 (21.6)       | 65 (15.7)          | 0.1616   | 1.47 | >1                   | (0.88–2.46)  |
| <i>DQB1*06:03</i> | 0 (0.0)         | 6 (1.5)            | 0.3474   | 0.27 | >1                   | (0.02–4.81)  |
| <i>DQB1*06:04</i> | 5 (4.3)         | 50 (12.1)          | 0.0150   | 0.33 | 0.2107               | (0.13–0.84)  |
| <i>DQB1*06:09</i> | 1 (0.9)         | 6 (1.5)            | 1.0000   | 0.59 | >1                   | (0.07–4.95)  |

Allele carrier frequencies are shown in parentheses (%). Association was tested by Fisher's exact test using 2X2 contingency tables. MCTD: mixed connective tissue disease, OR: odds ratio, 95%CI: confidence interval, *P<sub>c</sub>*: corrected *P* (*P<sub>c</sub>* values more than 1 were shown as ">1").
