# Supplementary material for: Predisposition of HLA-DRB1*04:01/*15 heterozygous genotypes to Japanese mixed connective tissue disease
Source: PubMed Central journal article supplement (PMC9200795; doi:10.1038/s41598-022-14116-x), 2022-06-15
Supplement: 41598_2022_14116_MOESM3_ESM.pdf [file 41598_2022_14116_MOESM3_ESM.pdf]

SupplementaryTable S3. *HLA-DQB1* genotype frequency in MCTD patients and the healthy controls.

|                        | MCTD (n=116) | Control (n=413) | <i>P</i> | OR   | 95%CI        |
|------------------------|--------------|-----------------|----------|------|--------------|
| <i>*03:01 / *06:01</i> | 7 (6.0)      | 20 (4.8)        | 0.6335   | 1.26 | (0.52–3.06)  |
| <i>*03:03 / *06:01</i> | 8 (6.9)      | 19 (4.6)        | 0.3402   | 1.54 | (0.65–3.60)  |
| <i>*03:01 / *06:02</i> | 5 (4.3)      | 9 (2.2)         | 0.2017   | 2.02 | (0.66–6.16)  |
| <i>*03:03 / *06:02</i> | 7 (6.0)      | 7 (1.7)         | 0.0178   | 3.72 | (1.28–10.85) |

MCTD: mixed connective tissue disease, OR: odds ratio, CI: confidence interval.

Genotype frequencies are shown in parentheses (%). Association was tested by Fisher's exact test using 2X2 contingency tables.
