# Supplementary material for: Predisposition of HLA-DRB1*04:01/*15 heterozygous genotypes to Japanese mixed connective tissue disease
Source: PubMed Central journal article supplement (PMC9200795; doi:10.1038/s41598-022-14116-x), 2022-06-15
Supplement: 41598_2022_14116_MOESM4_ESM.pdf [file 41598_2022_14116_MOESM4_ESM.pdf]

Supplementary Table S4. Conditional logistic regression analysis between the *HLA* alleles in MCTD.

| <i>HLA</i> allele | Unconditioned         |                   | Conditioned on <i>DRB1*04:01</i> |                                | Conditioned on <i>DQB1*03:01</i> |                                |
|-------------------|-----------------------|-------------------|----------------------------------|--------------------------------|----------------------------------|--------------------------------|
|                   | <i>P</i>              | OR (95%CI)        | <i>P</i> <sub>adjusted</sub>     | OR <sub>adjusted</sub> (95%CI) | <i>P</i> <sub>adjusted</sub>     | OR <sub>adjusted</sub> (95%CI) |
| <i>DRB1*04:01</i> | 6.93X10 <sup>-5</sup> | 5.92 (2.46–14.21) | NA                               | NA                             | 4.49X10 <sup>-6</sup>            | 12.46 (4.24–36.62)             |
| <i>DQB1*03:01</i> | 0.6103                | 0.89 (0.57–1.39)  | 0.0106                           | 0.44 (0.24–0.83)               | NA                               | NA                             |

  

| <i>HLA</i> allele | Unconditioned |                  | Conditioned on <i>DRB1*09:01</i> |                                | Conditioned on <i>DQB1*03:03</i> |                                |
|-------------------|---------------|------------------|----------------------------------|--------------------------------|----------------------------------|--------------------------------|
|                   | <i>P</i>      | OR (95%CI)       | <i>P</i> <sub>adjusted</sub>     | OR <sub>adjusted</sub> (95%CI) | <i>P</i> <sub>adjusted</sub>     | OR <sub>adjusted</sub> (95%CI) |
| <i>DRB1*09:01</i> | 0.0096        | 1.60 (1.12–2.29) | NA                               | NA                             | 0.8031                           | 1.15 (0.39–3.32)               |
| <i>DQB1*03:03</i> | 0.0079        | 1.62 (1.13–2.31) | 0.5116                           | 1.43 (0.49–4.11)               | NA                               | NA                             |

  

| <i>HLA</i> allele | Unconditioned |                  | Conditioned on <i>DRB1*13:02</i> |                                | Conditioned on <i>DQB1*06:04</i> |                                |
|-------------------|---------------|------------------|----------------------------------|--------------------------------|----------------------------------|--------------------------------|
|                   | <i>P</i>      | OR (95%CI)       | <i>P</i> <sub>adjusted</sub>     | OR <sub>adjusted</sub> (95%CI) | <i>P</i> <sub>adjusted</sub>     | OR <sub>adjusted</sub> (95%CI) |
| <i>DRB1*13:02</i> | 0.0080        | 0.29 (0.12–0.72) | NA                               | NA                             | 0.1522                           | 0.16 (0.01–1.99)               |
| <i>DQB1*06:04</i> | 0.0191        | 0.33 (0.13–0.84) | 0.5962                           | 2.01 (0.15–26.73)              | NA                               | NA                             |

MCTD: mixed connective tissue disease, OR: odds ratio, CI: confidence interval. *P*, OR, 95%CI, *P*<sub>adjusted</sub> and OR<sub>adjusted</sub> were calculated by logistic regression analysis under the additive model.
