# Supplementary material for: Predisposition of HLA-DRB1*04:01/*15 heterozygous genotypes to Japanese mixed connective tissue disease
Source: PubMed Central journal article supplement (PMC9200795; doi:10.1038/s41598-022-14116-x), 2022-06-15
Supplement: 41598_2022_14116_MOESM5_ESM.pdf [file 41598_2022_14116_MOESM5_ESM.pdf]

Supplementary Table S5. *DRB1\*04:01* allele carrier frequencies in SLE or SSc patients with or without anti-U1RNP Ab.

|                   | Anti-U1RNP Ab(+) | Anti-U1RNP Ab(-) | <i>P</i> | OR   | 95%CI         |
|-------------------|------------------|------------------|----------|------|---------------|
|                   | SLE (n=142)      | SLE (n=201)      |          |      |               |
| <i>DRB1*04:01</i> | 12 (8.5)         | 5 (2.5)          | 0.0204   | 3.62 | (1.25-10.51)  |
|                   | Anti-U1RNP Ab(+) | Anti-U1RNP Ab(-) | <i>P</i> | OR   | 95%CI         |
|                   | SSc (n=14)       | SSc (n=102)      |          |      |               |
| <i>DRB1*04:01</i> | 1 (7.1)          | 1 (1.0)          | 0.2277   | 7.77 | (0.46-131.84) |

SLE: systemic lupus erythematosus, SSc: systemic sclerosis, RNP: ribonucleoprotein, Ab: antibody, OR: odds ratio, CI: confidence interval. Allele carrier frequencies are shown in parentheses (%). Association was tested by Fisher's exact test using 2X2 contingency tables.
