# Supplementary material for: Predisposition of HLA-DRB1*04:01/*15 heterozygous genotypes to Japanese mixed connective tissue disease
Source: PubMed Central journal article supplement (PMC9200795; doi:10.1038/s41598-022-14116-x), 2022-06-15
Supplement: 41598_2022_14116_MOESM6_ESM.pdf [file 41598_2022_14116_MOESM6_ESM.pdf]

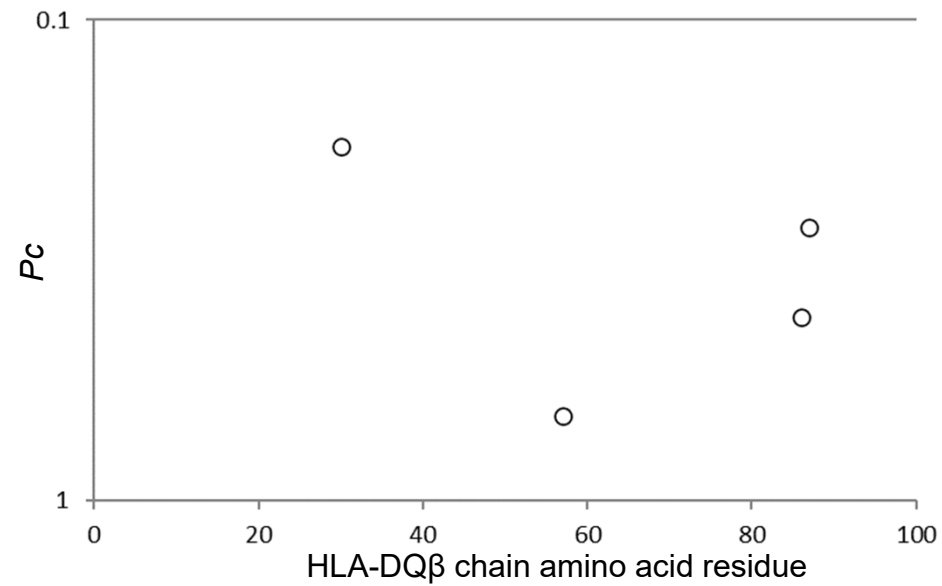

**Supplementary Figure S1. Associations of amino acid residues in the DQβ chain with MCTD.** Associations were established by Fisher's exact test using 2X2 contingency tables. Corrected *P* (*P<sub>c</sub>*) values were calculated by multiplying the *P* value by the number of amino acid residues tested. Positive associations are indicated by filled circles and negative by open circles. MCTD: mixed connective tissue disease.
